# Supplementary material for: Commercial Dacron cloth supported Cu(OH)2 nanobelt arrays for wearable supercapacitors
Source: Royal Society of Chemistry journal article supplement (doi:10.1039/c6ta06634h), 2016-01-01
Supplement: c6ta06634h1.pdf [file c6ta06634h1.pdf]

## Electronic Supplementary Information

### Commercial Dacron cloth supported Cu(OH)<sub>2</sub> nanobelt arrays for wearable supercapacitors

Shuijin Lei<sup>ab</sup>, Yan Liu<sup>b</sup>, Linfeng Fei<sup>b</sup>, Ruobing Song<sup>b</sup>, Wei Lu<sup>b</sup>, Longlong Shu<sup>a</sup>, Chee  
Leung Mak<sup>\*b</sup>, Yu Wang<sup>\*a</sup> and Haitao Huang<sup>\*b</sup>

<sup>a</sup> *School of Materials Science and Engineering, Nanchang University, Jiangxi 330031,  
China*

<sup>b</sup> *Department of Applied Physics, The Hong Kong Polytechnic University, Hong Kong  
SAR, China*

---

\* Corresponding authors.

*Email addresses:* aphhuang@polyu.edu.hk (H. T. Huang), wangyu@ncu.edu.cn (Y. Wang),  
apaclmak@polyu.edu.hk (C. L. Mak).

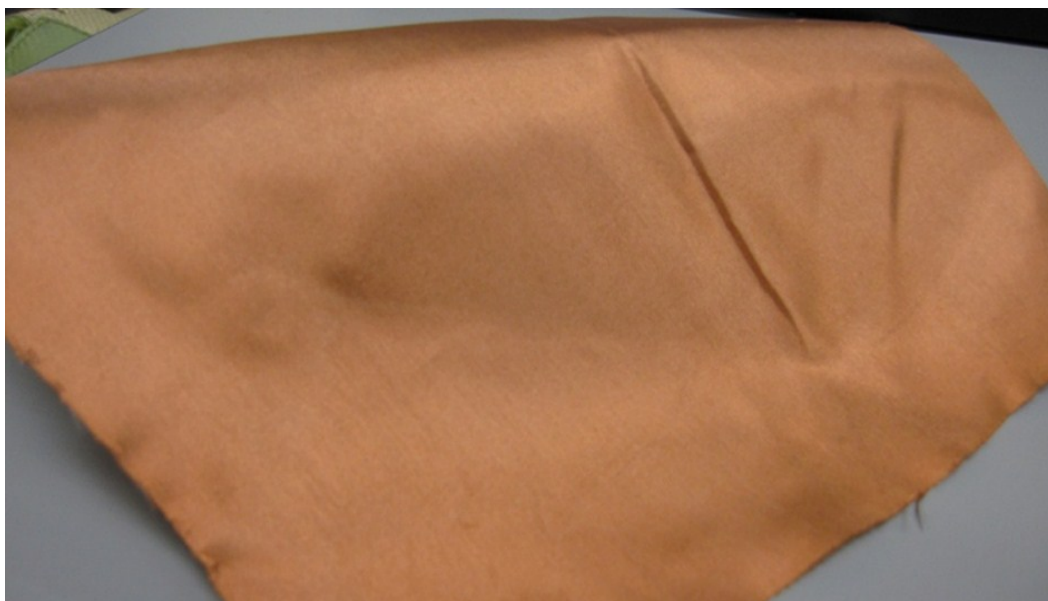

**Fig. S1** Photograph of a large piece of copper-plated Dacron cloth.

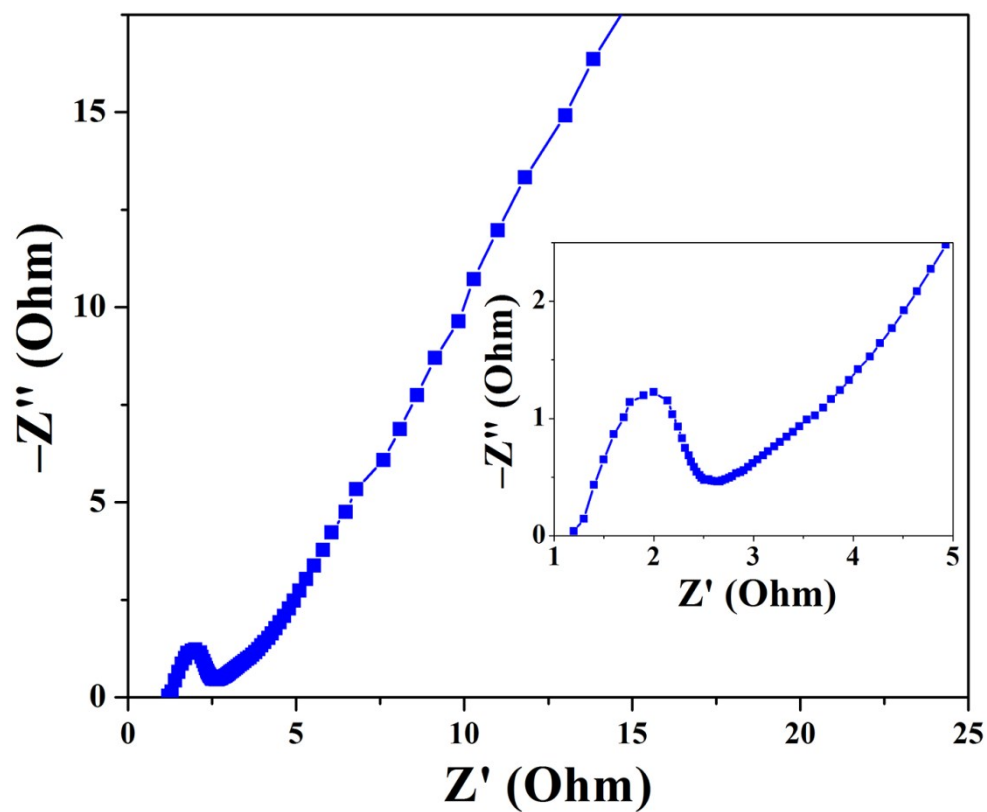

**Fig. S2** Nyquist plot of the  $\text{Cu}(\text{OH})_2/\text{Cu}/\text{Dacron}$  positive electrode. Inset: enlarged part of the plot.

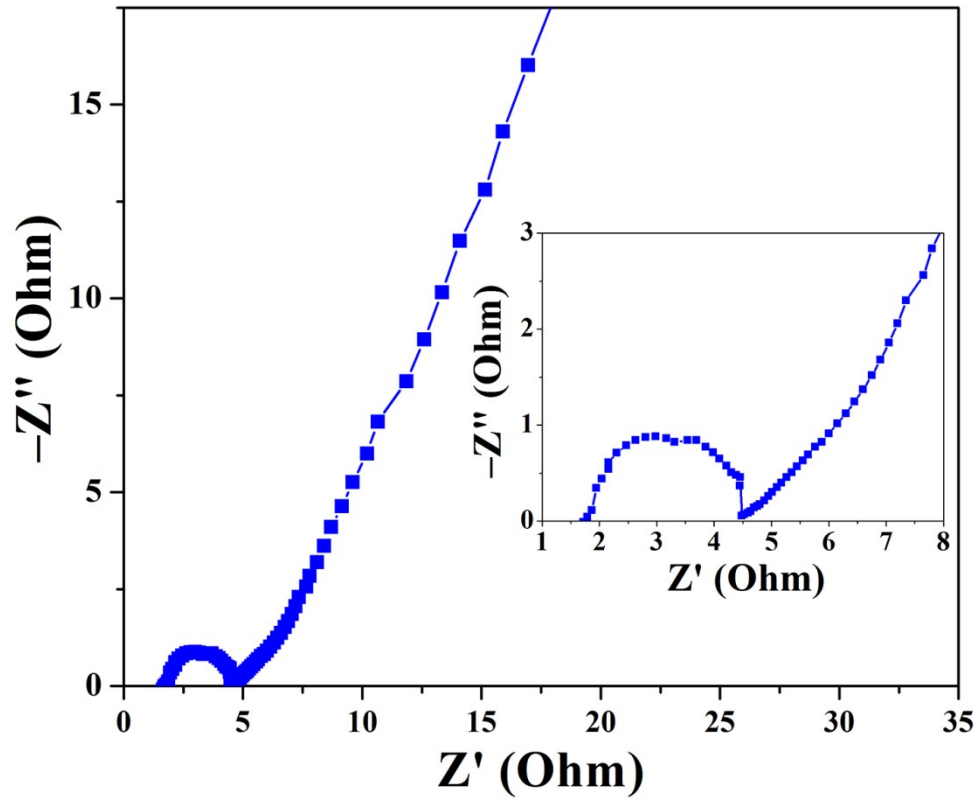

**Fig. S3** Nyquist plot of the flexible all-solid-state asymmetric supercapacitor device.

Inset: enlarged part of the plot.

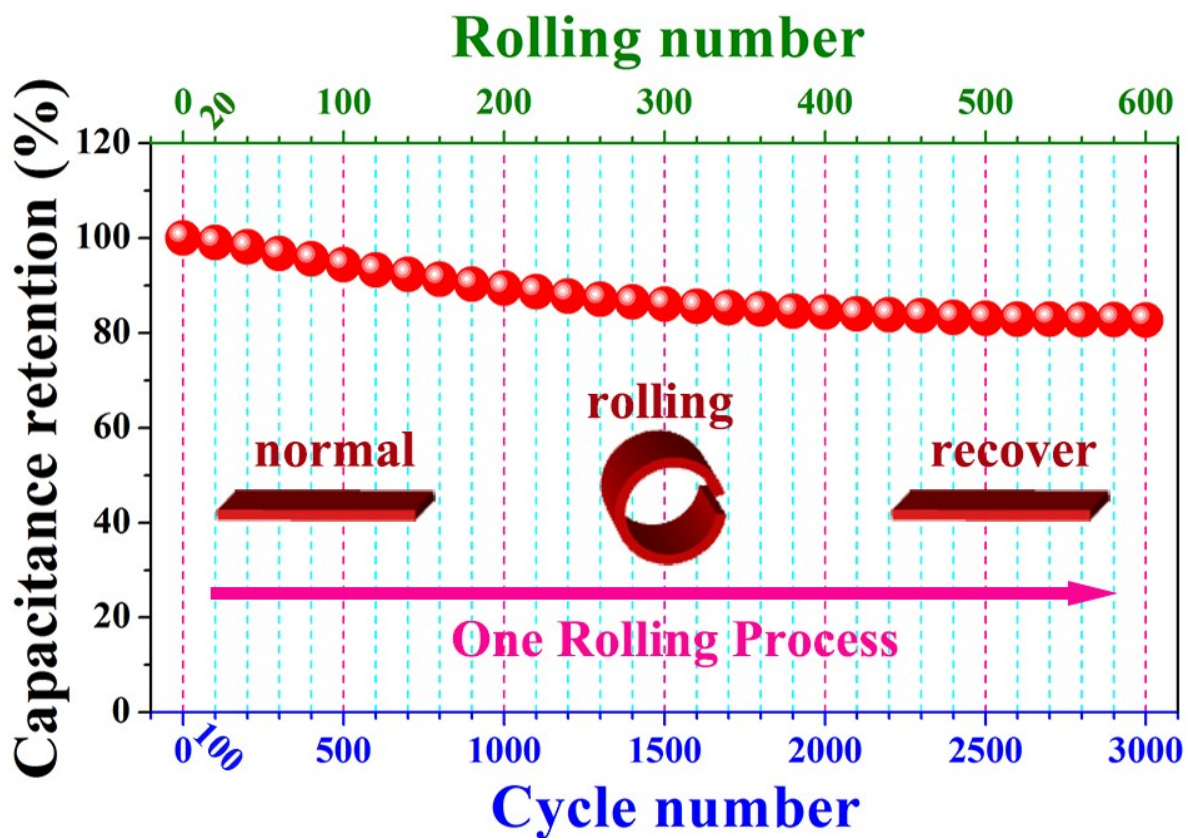

Fig. S4 Capacitance retention as a function of the rolling and cycling numbers.
